# Supplementary material
Source: PubMed Central journal article supplement (PMC5834378)
Supplement: NIHMS934449-supplement-supplement_1.pdf [file NIHMS934449-supplement-supplement_1.pdf]

**Supplementary table 1. Hazard ratios and 95% confidence intervals for incidence of coronary heart disease (CHD) in men and women based on neighborhood socioeconomic status (SES); Results of Cox proportional hazard models.**

| Sex              | Men              |                  |                  | Women            |                  |                  |
|------------------|------------------|------------------|------------------|------------------|------------------|------------------|
| Age Group        | 40               | 50               | 60               | 40               | 50               | 60               |
| Total population | 1.07 (1.06-1.09) | 1.05 (1.05-1.06) | 1.04 (1.04-1.05) | 1.11 (1.09-1.13) | 1.10 (1.09-1.11) | 1.08 (1.07-1.09) |
| Half-siblings    | 1.08 (1.02-1.13) | 1.02 (0.97-1.02) | 0.99 (0.93-1.06) | 1.09 (1.01-1.17) | 1.13 (1.07-1.20) | 1.18 (1.09-1.28) |
| Full siblings    | 1.07 (1.04-1.10) | 1.04 (1.02-1.05) | 1.02 (1.01-1.04) | 1.11 (1.07-1.16) | 1.06 (1.03-1.08) | 1.08 (1.06-1.10) |

**Supplementary table 2. Hazard ratios and 95% confidence intervals for incidence of ischemic stroke in men and women based on neighborhood socioeconomic status (SES); Results of Cox proportional hazard models.**

| Sex              | Men              |                  |                  | Women            |                  |                  |
|------------------|------------------|------------------|------------------|------------------|------------------|------------------|
| Age Group        | 40               | 50               | 60               | 40               | 50               | 60               |
| Total population | 1.04 (1.02-1.06) | 1.03 (1.02-1.04) | 1.02 (1.01-1.03) | 1.07 (1.05-1.09) | 1.04 (1.03-1.05) | 1.04 (1.03-1.05) |
| Half-siblings    | 0.95 (0.87-1.03) | 1.10 (1.04-1.17) | 0.98 (0.91-1.06) | 1.06 (0.98-1.16) | 0.97 (0.89-1.05) | 1.01 (0.93-1.09) |
| Full siblings    | 1.03 (0.99-1.07) | 1.03 (1.01-1.05) | 1.04 (1.02-1.06) | 1.05 (1.00-1.10) | 1.02 (0.99-1.04) | 1.05 (1.02-1.07) |

**Highlights:**

- Neighborhood deprivation is associated with coronary heart disease and stroke.
- This association is unaffected by increasing genetic resemblance.
- A causal association is plausible, particularly for coronary heart disease among women.
